# Supplementary material
Source: PubMed Central journal article supplement (PMC5811197)
Supplement: NIHMS940229-supplement-Supplemtnal_information.pdf [file NIHMS940229-supplement-Supplemtnal_information.pdf]

## SUPPORTING INFORMATION

### Insights into the Molecular Flexibility of Theta-defensins by NMR

#### Relaxation Analysis.

*Anne C. Conibear,<sup>[a]</sup> Conan K. Wang,<sup>[a]</sup> Tao Bi,<sup>[b]</sup> K. Johan Rosengren,<sup>[a,c]</sup> Julio A.*

*Camarero,<sup>[b,d]</sup> and David J. Craik<sup>[a]\*</sup>*

<sup>[a]</sup>Institute for Molecular Bioscience, The University of Queensland, Brisbane, QLD 4072, Australia.

<sup>[b]</sup>Department of Pharmacology and Pharmaceutical Sciences, School of Pharmacy, University of Southern California, 1985 Zonal Avenue, PSC 616, Los Angeles, CA 90033, USA.

<sup>[c]</sup> School of Biomedical Sciences, The University of Queensland, Brisbane, QLD 4072, Australia.

<sup>[d]</sup> Department of Chemistry, College of Letters, Arts and Sciences, University of Southern California, Los Angeles, CA 90033, USA.

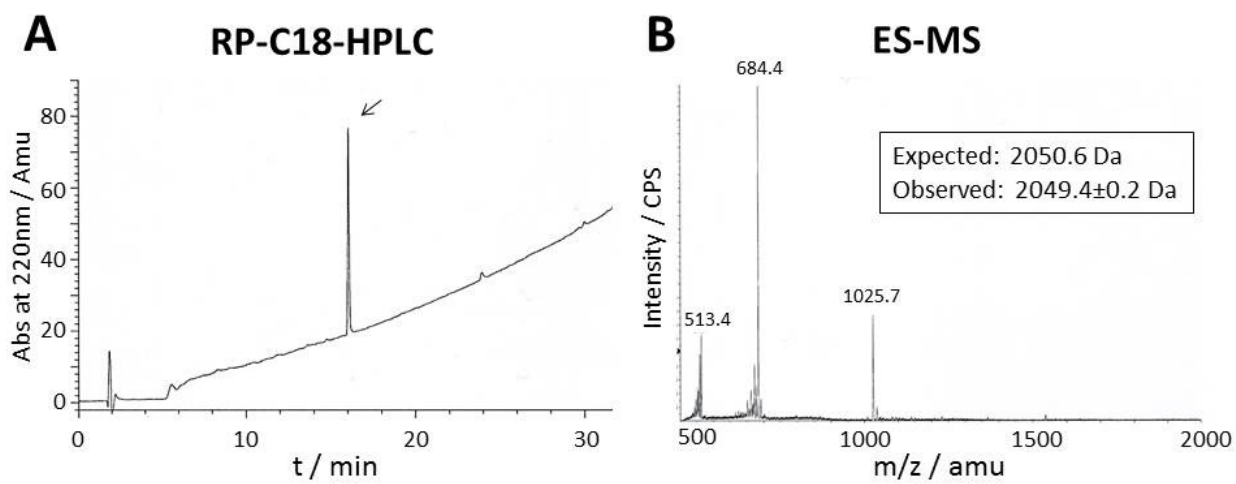

**Figure S1.**Characterization of  $^{15}\text{N}$ -labeled HTD-2. Reverse-phase HPLC analysis (A) and ES-MS analysis (B) of purified  $^{15}\text{N}$ -labeled HTD-2.

Supplementary Figure S2: Secondary H $\alpha$  chemical shifts of HTD-2

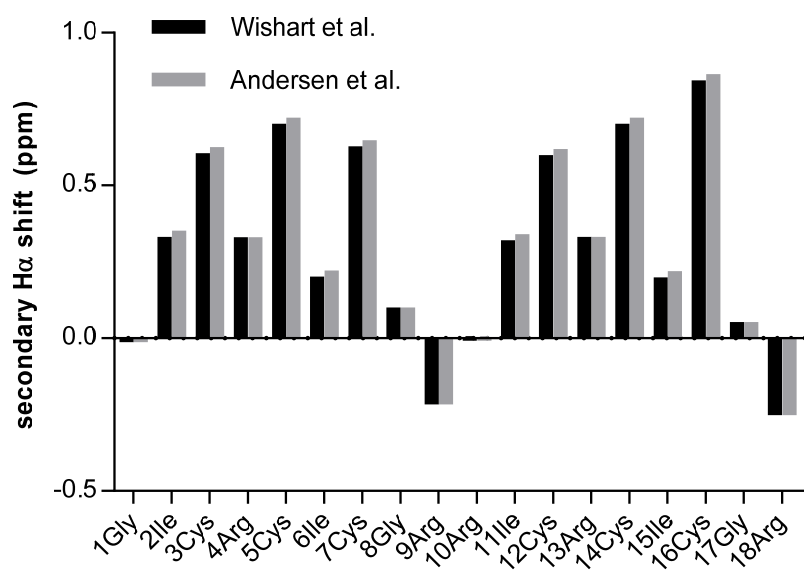

**Supplementary Table S1.** Forward (p5) and reverse (p3) 5'-phosphorylated oligonucleotides used to clone the different TEV-HTD2-intein linear precursors into the pTXB1 expression plasmid.

| Peptide |    | Oligonucleotide Sequence                                                                |
|---------|----|-----------------------------------------------------------------------------------------|
| HTD-2   | p5 | 5'-TATGGAAAACCTGTACTTCCAGTGCATCTGCGGTCGTCGTATC<br>TGCCGTTGCATCTGCGGTCGTGGTATCTGCCGT-3'  |
|         | p3 | 5'-GCAACGGCAGATACCACGACCGCAGATGCAACGGCAGATACG<br>ACGACCGCAGATGCACTGGAAGTACAGGTTTTCCA-3' |

**Supplementary Table S2: T1 relaxation times of <sup>15</sup>N-labelled HTD-2.**

| Residue | 500 MHz |      | 600 MHz |      | 900 MHz |      |
|---------|---------|------|---------|------|---------|------|
|         | mean    | s.d. | mean    | s.d. | mean    | s.d. |
| 1 Gly   | 0.57    | 0.04 | 0.65    | 0.02 | 0.71    | 0.05 |
| 2 Ile   | 0.57    | 0.02 | 0.60    | 0.01 | 0.61    | 0.01 |
| 3 Cys   |         |      |         |      |         |      |
| 4 Arg   | 0.59    | 0.02 | 0.58    | 0.02 | 0.57    | 0.01 |
| 5 Cys   | 0.56    | 0.01 | 0.60    | 0.01 | 0.63    | 0.01 |
| 6 Ile   | 0.54    | 0.01 | 0.56    | 0.03 | 0.56    | 0.00 |
| 7 Cys   | 0.53    | 0.01 | 0.57    | 0.01 | 0.57    | 0.00 |
| 8 Gly   | 0.55    | 0.01 | 0.57    | 0.01 | 0.63    | 0.00 |
| 9 Arg   | 0.61    | 0.01 | 0.65    | 0.01 | 0.64    | 0.01 |
| 10 Arg  | 0.67    | 0.04 | 0.69    | 0.02 |         |      |
| 11 Ile  | 0.62    | 0.02 | 0.64    | 0.01 | 0.64    | 0.02 |
| 12 Cys  |         |      |         |      |         |      |
| 13 Arg  | 0.58    | 0.01 | 0.57    | 0.01 | 0.60    | 0.00 |
| 14 Cys  | 0.56    | 0.03 | 0.59    | 0.01 | 0.59    | 0.01 |
| 15 Ile  | 0.54    | 0.01 | 0.55    | 0.01 | 0.58    | 0.01 |
| 16 Cys  | 0.52    | 0.01 | 0.58    | 0.02 | 0.59    | 0.02 |
| 17 Gly  | 0.61    | 0.03 | 0.58    | 0.01 | 0.61    | 0.01 |
| 18 Arg  | 0.60    | 0.02 | 0.68    | 0.04 | 0.71    | 0.06 |

**Supplementary Table S3: NOE values of <sup>15</sup>N-labelled HTD-2.**

| Residue | 500 MHz |      | 600 MHz |      | 900 MHz |      |
|---------|---------|------|---------|------|---------|------|
|         | mean    | s.d. | mean    | s.d. | mean    | s.d. |
| 1 Gly   | -0.26   | 0.09 | 0.03    | 0.00 | 0.57    | 0.03 |
| 2 Ile   | -0.36   | 0.03 | 0.05    | 0.00 | 0.60    | 0.01 |
| 3 Cys   | -0.23   | 0.10 | 0.07    | 0.01 | 0.58    | 0.08 |
| 4 Arg   | -0.47   | 0.08 | 0.04    | 0.00 | 0.63    | 0.02 |
| 5 Cys   | -0.39   | 0.06 | 0.06    | 0.00 | 0.67    | 0.03 |
| 6 Ile   | -0.38   | 0.05 | 0.13    | 0.01 | 0.65    | 0.02 |
| 7 Cys   | -0.35   | 0.03 | 0.12    | 0.00 | 0.61    | 0.01 |
| 8 Gly   | -0.30   | 0.07 | 0.09    | 0.01 | 0.62    | 0.01 |
| 9 Arg   | -0.31   | 0.03 | 0.08    | 0.00 | 0.56    | 0.00 |
| 10 Arg  | -0.29   | 0.12 | -0.04   | 0.01 | 0.47    | 0.01 |
| 11 Ile  | -0.28   | 0.10 | -0.07   | 0.01 | 0.56    | 0.01 |
| 12 Cys  | -0.21   | 0.05 | 0.09    | 0.03 | 0.51    | 0.04 |
| 13 Arg  | -0.38   | 0.05 | 0.04    | 0.01 | 0.59    | 0.03 |
| 14 Cys  | -0.39   | 0.06 | 0.06    | 0.01 | 0.65    | 0.03 |
| 15 Ile  | -0.38   | 0.05 | 0.13    | 0.01 | 0.64    | 0.02 |
| 16 Cys  | -0.25   | 0.06 | 0.08    | 0.00 | 0.62    | 0.02 |
| 17 Gly  | -0.32   | 0.00 | 0.08    | 0.00 | 0.65    | 0.01 |
| 18 Arg  | -0.25   | 0.04 | 0.04    | 0.00 | 0.44    | 0.02 |

**Supplementary Table S4.** Experimental NMR relaxation data for HTD-2 and fitted data using ModelFree.

| Residue              | Data <sup>[a]</sup>      | T <sub>1</sub> (s) |      |      | NOE   |      |      | $\theta$<br>(°) | $\tau_i$<br>(ps) | S <sup>2</sup> | RMSD <sup>[b]</sup> |
|----------------------|--------------------------|--------------------|------|------|-------|------|------|-----------------|------------------|----------------|---------------------|
|                      |                          | 500                | 600  | 900  | 500   | 600  | 900  |                 |                  |                |                     |
| 1 Gly                | <i>Exp</i>               | 0.57               | 0.65 | 0.71 | -0.26 | 0.03 | 0.57 | 111             |                  |                |                     |
|                      | IsoRigid <sup>[c]</sup>  | 0.46               | 0.47 | 0.46 | -0.31 | 0.04 | 0.57 |                 |                  |                | 0.33                |
|                      | Ax Rigid <sup>[d]</sup>  | 0.46               | 0.47 | 0.45 | -0.32 | 0.04 | 0.56 | 111             |                  |                | 0.33                |
|                      | Iso + Int <sup>[e]</sup> | 0.64               | 0.65 | 0.64 | -0.30 | 0.03 | 0.51 |                 | 19               | 0.68           | 0.11                |
|                      | Ax + Int <sup>[f]</sup>  | 0.64               | 0.65 | 0.64 | -0.29 | 0.03 | 0.50 | 111             | 21               | 0.68           | 0.11                |
| 2 Ile                | <i>Exp</i>               | 0.57               | 0.60 | 0.61 | -0.36 | 0.05 | 0.60 | 80              |                  |                |                     |
|                      | IsoRigid                 | 0.46               | 0.47 | 0.46 | -0.31 | 0.04 | 0.57 |                 |                  |                | 0.24                |
|                      | Ax Rigid                 | 0.46               | 0.47 | 0.45 | -0.31 | 0.04 | 0.57 | 80              |                  |                | 0.24                |
|                      | Iso + Int                | 0.60               | 0.61 | 0.60 | -0.28 | 0.05 | 0.53 |                 | 19               | 0.73           | 0.08                |
|                      | Ax + Int                 | 0.60               | 0.61 | 0.60 | -0.28 | 0.05 | 0.53 | 80              | 18               | 0.73           | 0.08                |
| 3 Cys <sup>[g]</sup> | <i>Exp</i>               |                    |      |      | -0.23 | 0.07 | 0.58 | 91              |                  |                |                     |
|                      | IsoRigid                 |                    |      |      | -0.31 | 0.04 | 0.57 |                 |                  |                | 0.06                |
|                      | Ax Rigid                 |                    |      |      | -0.31 | 0.04 | 0.57 | 91              |                  |                | 0.06                |
|                      | Iso + Int                |                    |      |      | -0.26 | 0.07 | 0.57 |                 | 167              | 0.73           | 0.03                |
|                      | Ax + Int                 |                    |      |      | -0.26 | 0.07 | 0.56 | 91              | 125              | 0.66           | 0.03                |
| 4 Arg                | <i>Exp</i>               | 0.59               | 0.58 | 0.57 | -0.47 | 0.04 | 0.63 | 82              |                  |                |                     |
|                      | IsoRigid                 | 0.46               | 0.47 | 0.46 | -0.31 | 0.04 | 0.57 |                 |                  |                | 0.24                |
|                      | Ax Rigid                 | 0.46               | 0.47 | 0.45 | -0.31 | 0.04 | 0.57 | 82              |                  |                | 0.24                |
|                      | Iso + Int                | 0.57               | 0.58 | 0.57 | -0.29 | 0.04 | 0.52 |                 | 26               | 0.77           | 0.15                |
|                      | Ax + Int                 | 0.57               | 0.58 | 0.57 | -0.29 | 0.04 | 0.52 | 82              | 25               | 0.77           | 0.15                |
| 5 Cys                | <i>Exp</i>               | 0.56               | 0.60 | 0.63 | 0.39  | 0.06 | 0.67 | 79              |                  |                |                     |
|                      | IsoRigid                 | 0.46               | 0.47 | 0.46 | -0.31 | 0.04 | 0.57 |                 |                  |                | 0.26                |

|                       |            |             |             |             |              |              |             |            |    |      |      |
|-----------------------|------------|-------------|-------------|-------------|--------------|--------------|-------------|------------|----|------|------|
|                       | Ax Rigid   | 0.46        | 0.47        | 0.45        | -0.31        | 0.04         | 0.57        | 79         |    |      | 0.26 |
|                       | Iso + Int  | 0.61        | 0.62        | 0.61        | -0.27        | 0.06         | 0.55        |            | 13 | 0.72 | 0.14 |
|                       | Ax + Int   | 0.61        | 0.62        | 0.61        | -0.27        | 0.06         | 0.55        | 79         | 13 | 0.73 | 0.13 |
| 6 Ile                 | <i>Exp</i> | <i>0.54</i> | <i>0.56</i> | <i>0.56</i> | <i>-0.38</i> | <i>0.13</i>  | <i>0.65</i> | <i>67</i>  |    |      |      |
|                       | IsoRigid   | 0.46        | 0.47        | 0.46        | -0.31        | 0.04         | 0.57        |            |    |      | 0.20 |
|                       | Ax Rigid   | 0.46        | 0.47        | 0.45        | -0.32        | 0.03         | 0.56        | 67         |    |      | 0.20 |
|                       | Iso + Int  | 0.56        | 0.57        | 0.56        | -0.23        | 0.10         | 0.59        |            | 2  | 0.80 | 0.12 |
|                       | Ax + Int   | 0.55        | 0.57        | 0.56        | -0.21        | 0.12         | 0.60        | 67         | 2  | 0.80 | 0.13 |
| 7 Cys                 | <i>Exp</i> | <i>0.53</i> | <i>0.57</i> | <i>0.57</i> | <i>-0.35</i> | <i>0.12</i>  | <i>0.61</i> | <i>86</i>  |    |      |      |
|                       | IsoRigid   | 0.46        | 0.47        | 0.46        | -0.31        | 0.04         | 0.57        |            |    |      | 0.19 |
|                       | Ax Rigid   | 0.46        | 0.47        | 0.45        | -0.31        | 0.04         | 0.57        | 86         |    |      | 0.19 |
|                       | Iso + Int  | 0.56        | 0.57        | 0.56        | -0.23        | 0.10         | 0.59        |            | 1  | 0.79 | 0.10 |
|                       | Ax + Int   | 0.56        | 0.57        | 0.56        | -0.23        | 0.10         | 0.59        | 86         | 1  | 0.79 | 0.09 |
| 8 Gly                 | <i>Exp</i> | <i>0.55</i> | <i>0.57</i> | <i>0.63</i> | <i>-0.30</i> | <i>0.09</i>  | <i>0.62</i> | <i>87</i>  |    |      |      |
|                       | IsoRigid   | 0.46        | 0.47        | 0.46        | -0.31        | 0.04         | 0.57        |            |    |      | 0.23 |
|                       | Ax Rigid   | 0.46        | 0.47        | 0.45        | -0.31        | 0.04         | 0.57        | 87         |    |      | 0.23 |
|                       | Iso + Int  | 0.60        | 0.62        | 0.60        | -0.23        | 0.10         | 0.59        |            | 1  | 0.74 | 0.09 |
|                       | Ax + Int   | 0.60        | 0.62        | 0.60        | -0.24        | 0.10         | 0.59        | 87         | 1  | 0.74 | 0.09 |
| 9 Arg                 | <i>Exp</i> | <i>0.61</i> | <i>0.65</i> | <i>0.64</i> | <i>-0.31</i> | <i>0.08</i>  | <i>0.56</i> | <i>85</i>  |    |      |      |
|                       | IsoRigid   | 0.46        | 0.47        | 0.46        | -0.31        | 0.04         | 0.57        |            |    |      | 0.31 |
|                       | Ax Rigid   | 0.46        | 0.47        | 0.45        | -0.31        | 0.04         | 0.57        | 85         |    |      | 0.31 |
|                       | Iso + Int  | 0.64        | 0.65        | 0.64        | -0.25        | 0.08         | 0.56        |            | 7  | 0.69 | 0.05 |
|                       | Ax + Int   | 0.64        | 0.65        | 0.64        | -0.26        | 0.07         | 0.56        | 85         | 6  | 0.69 | 0.05 |
| 10 Arg <sup>[h]</sup> | <i>Exp</i> | <i>0.67</i> | <i>0.69</i> |             | <i>-0.29</i> | <i>-0.04</i> | <i>0.47</i> | <i>76</i>  |    |      |      |
|                       | IsoRigid   | 0.46        | 0.47        | 0.46        | -0.31        | 0.04         | 0.57        |            |    |      | 0.32 |
|                       | Ax Rigid   | 0.46        | 0.47        | 0.45        | -0.31        | 0.04         | 0.57        | 76         |    |      | 0.32 |
|                       | Iso + Int  | 0.67        | 0.68        |             | -0.35        | -0.03        | 0.45        |            | 28 | 0.64 | 0.04 |
|                       | Ax + Int   | 0.67        | 0.68        | 0.67        | -0.35        | -0.03        | 0.45        | 76         | 28 | 0.64 | 0.04 |
| 11 Ile                | <i>Exp</i> | <i>0.62</i> | <i>0.64</i> | <i>0.64</i> | <i>-0.28</i> | <i>-0.07</i> | <i>0.56</i> | <i>117</i> |    |      |      |



|                       |            |      |      |      |       |       |      |     |     |      |      |
|-----------------------|------------|------|------|------|-------|-------|------|-----|-----|------|------|
|                       | IsoRigid   | 0.46 | 0.47 | 0.46 | -0.31 | 0.04  | 0.57 |     |     |      | 0.32 |
|                       | Ax Rigid   | 0.46 | 0.47 | 0.46 | -0.32 | 0.03  | 0.56 | 117 |     |      | 0.31 |
|                       | Iso + Int  | 0.63 | 0.64 | 0.63 | -0.35 | -0.03 | 0.45 |     | 34  | 0.68 | 0.10 |
|                       | Ax + Int   | 0.63 | 0.64 | 0.63 | -0.34 | -0.03 | 0.44 | 117 | 37  | 0.67 | 0.10 |
| 12 Cys <sup>[g]</sup> | <i>Exp</i> |      |      |      | -0.21 | 0.09  | 0.51 | 89  |     |      |      |
|                       | IsoRigid   |      |      |      | -0.31 | 0.04  | 0.57 |     |     |      | 0.09 |
|                       | Ax Rigid   |      |      |      | -0.31 | 0.04  | 0.57 | 89  |     |      | 0.09 |
|                       | Iso + Int  |      |      |      | -0.25 | 0.08  | 0.57 |     | 127 | 0.68 | 0.05 |
|                       | Ax + Int   |      |      |      | -0.25 | 0.08  | 0.57 | 89  | 127 | 0.72 | 0.06 |
| 13 Arg                | <i>Exp</i> | 0.58 | 0.57 | 0.60 | -0.38 | 0.04  | 0.59 | 91  |     |      |      |
|                       | IsoRigid   | 0.46 | 0.47 | 0.46 | -0.31 | 0.04  | 0.57 |     |     |      | 0.22 |
|                       | Ax Rigid   | 0.46 | 0.46 | 0.45 | -0.31 | 0.04  | 0.57 | 91  |     |      | 0.22 |
|                       | Iso + Int  | 0.59 | 0.60 | 0.59 | -0.29 | 0.04  | 0.52 |     | 22  | 0.74 | 0.09 |
|                       | Ax + Int   | 0.59 | 0.60 | 0.59 | -0.29 | 0.04  | 0.52 | 91  | 20  | 0.74 | 0.09 |
| 14 Cys                | <i>Exp</i> | 0.56 | 0.59 | 0.59 | -0.39 | 0.06  | 0.65 | 101 |     |      |      |
|                       | IsoRigid   | 0.46 | 0.47 | 0.46 | -0.31 | 0.04  | 0.57 |     |     |      | 0.23 |
|                       | Ax Rigid   | 0.46 | 0.47 | 0.45 | -0.31 | 0.04  | 0.57 | 101 |     |      | 0.23 |
|                       | Iso + Int  | 0.57 | 0.59 | 0.58 | -0.26 | 0.07  | 0.56 |     | 13  | 0.77 | 0.12 |
|                       | Ax + Int   | 0.57 | 0.59 | 0.58 | -0.26 | 0.07  | 0.56 | 101 | 12  | 0.77 | 0.12 |
| 15 Ile                | <i>Exp</i> | 0.54 | 0.55 | 0.58 | -0.38 | 0.13  | 0.64 | 114 |     |      |      |
|                       | IsoRigid   | 0.46 | 0.47 | 0.46 | -0.31 | 0.04  | 0.57 |     |     |      | 0.20 |
|                       | Ax Rigid   | 0.46 | 0.47 | 0.45 | -0.32 | 0.03  | 0.56 | 114 |     |      | 0.20 |
|                       | Iso + Int  | 0.55 | 0.56 | 0.55 | -0.23 | 0.10  | 0.59 |     | 1   | 0.81 | 0.12 |
|                       | Ax + Int   | 0.55 | 0.56 | 0.55 | -0.21 | 0.12  | 0.60 | 114 | 2   | 0.81 | 0.13 |
| 16 Cys                | <i>Exp</i> | 0.52 | 0.58 | 0.59 | -0.25 | 0.07  | 0.62 | 98  |     |      |      |
|                       | IsoRigid   | 0.46 | 0.47 | 0.46 | -0.31 | 0.04  | 0.57 |     |     |      | 0.20 |
|                       | Ax Rigid   | 0.46 | 0.47 | 0.45 | -0.31 | 0.04  | 0.57 | 98  |     |      | 0.20 |
|                       | Iso + Int  | 0.55 | 0.56 | 0.55 | -0.25 | 0.08  | 0.56 |     | 13  | 0.80 | 0.06 |
|                       | Ax + Int   | 0.55 | 0.56 | 0.55 | -0.25 | 0.08  | 0.57 | 98  | 11  | 0.80 | 0.06 |

|        |            |      |      |      |       |      |      |     |    |      |      |
|--------|------------|------|------|------|-------|------|------|-----|----|------|------|
| 17 Gly | <i>Exp</i> | 0.61 | 0.58 | 0.61 | -0.32 | 0.08 | 0.65 | 94  |    |      |      |
|        | IsoRigid   | 0.46 | 0.47 | 0.46 | -0.31 | 0.04 | 0.57 |     |    |      | 0.26 |
|        | Ax Rigid   | 0.46 | 0.47 | 0.45 | -0.31 | 0.04 | 0.57 | 94  |    |      | 0.26 |
|        | Iso + Int  | 0.61 | 0.62 | 0.61 | -0.27 | 0.06 | 0.55 |     | 13 | 0.72 | 0.09 |
|        | Ax + Int   | 0.61 | 0.62 | 0.61 | -0.27 | 0.06 | 0.55 | 94  | 12 | 0.73 | 0.09 |
| 18 Arg | <i>Exp</i> | 0.60 | 0.68 | 0.71 | -0.25 | 0.04 | 0.44 | 127 |    |      |      |
|        | IsoRigid   | 0.46 | 0.47 | 0.46 | -0.31 | 0.04 | 0.57 |     |    |      | 0.38 |
|        | Ax Rigid   | 0.46 | 0.47 | 0.46 | -0.34 | 0.02 | 0.56 | 127 |    |      | 0.38 |
|        | Iso + Int  | 0.62 | 0.63 | 0.62 | -0.29 | 0.04 | 0.52 |     | 18 | 0.70 | 0.12 |
|        | Ax + Int   | 0.62 | 0.63 | 0.63 | -0.27 | 0.04 | 0.50 | 127 | 26 | 0.68 | 0.11 |

---

|                     |           |      |      |      |      |      |      |  |  |  |  |
|---------------------|-----------|------|------|------|------|------|------|--|--|--|--|
| RMSD <sup>[i]</sup> | IsoRigid  | 0.50 | 0.58 | 0.65 | 0.20 | 0.16 | 0.20 |  |  |  |  |
|                     | Ax Rigid  | 0.50 | 0.58 | 0.65 | 0.21 | 0.16 | 0.19 |  |  |  |  |
|                     | Iso + Int | 0.12 | 0.09 | 0.13 | 0.29 | 0.05 | 0.21 |  |  |  |  |
|                     | Ax + Int  | 0.12 | 0.09 | 0.13 | 0.29 | 0.04 | 0.21 |  |  |  |  |

---

<sup>[a]</sup> Abbreviations used: Exp, experimental data; IsoRigid, isotropic rigid; Ax Rigid, axial rigid; Iso + Int, isotropic with internal motion, Ax + Int, axial with internal motion.

$$^{[b]}RMSD = \sqrt{\sum(T_1^{exp} - T_1^{calc})^2 + \sum[0.5(NOExp - NOEcalc)^2]}$$

RMSD is the root mean square deviation between the experimental and fitted (calc)  $T_1$  and NOE values. The NOE deviations were weighted by 50% because of their intrinsically higher errors compared to the  $T_1$  values.

<sup>[c]</sup>For isotropic rigid motion, the overall correlation time,  $\tau_0 = 1.07$  ns.

<sup>[d]</sup>For axial rigid motion, the overall correlation time,  $\tau_0 = 1.06$  ns and the  $D_{ratio} = 0.90$ .

<sup>[e]</sup>For isotropic with internal motion, the overall correlation time,  $\tau_0 = 1.13$  ns.

<sup>[f]</sup>For axial with internal motion, the overall correlation time,  $\tau_0 = 1.16$  ns and the  $D_{ratio} = 1.27$ .

<sup>[g]</sup> The  $^{15}N$  HSQC peaks for Cys3 and Cys12 were overlapped with those of Ile6 and Ile15 and a satisfactory exponential fit could not be obtained to determine  $T_1$ .

<sup>[h]</sup> Broadening of the Arg10 NH peak resulted in a poor exponential fit so Arg10  $T_1$  was excluded from the analysis.

$$^{[i]}RMSD = \sqrt{\sum(\exp - calc)^2}$$

RMSD is the root mean square deviation between the experimental and fitted (calc)  $T_1$  and NOE values calculated over all the residues at each field strength.

**Supplementary Table S5: Fitted parameters and errors using an in-house spreadsheet.**

| Model            | Residue(s) | $\tau_0$ (ps) | s.d.  | $D_{\text{ratio}}$ | s.d. | $\tau_i$ (ps) | s.d.  | $S^2$ | s.d. |
|------------------|------------|---------------|-------|--------------------|------|---------------|-------|-------|------|
| <i>IsoRigid</i>  |            |               |       |                    |      |               |       |       |      |
|                  | All        | 1.05          | 0.004 |                    |      |               |       |       |      |
| <i>Ax Rigid</i>  |            |               |       |                    |      |               |       |       |      |
|                  | All        | 1.08          | NA    | 2.44               | NA   |               |       |       |      |
|                  | All        | 1.02          | 0.03  | 0.87               | 0.07 |               |       |       |      |
| <i>Iso + Int</i> |            |               |       |                    |      |               |       |       |      |
|                  | All        | 1.09          | 0.007 |                    |      |               |       |       |      |
|                  | 1 Gly      |               |       |                    |      | 2.45          | 3.82  | 0.71  | 0.03 |
|                  | 2 Ile      |               |       |                    |      | 6.15          | 3.37  | 0.76  | 0.01 |
|                  | 3 Cys      |               |       |                    |      | 24.92         | 16.94 | 0.93  | 0.15 |
|                  | 4 Arg      |               |       |                    |      | 17.56         | 8.43  | 0.77  | 0.02 |
|                  | 5 Cys      |               |       |                    |      | 1.34          | 3.10  | 0.77  | 0.01 |
|                  | 6 Ile      |               |       |                    |      | 0.00          | 0.00  | 0.82  | 0.02 |
|                  | 7 Cys      |               |       |                    |      | 0.00          | 0.00  | 0.82  | 0.01 |
|                  | 8 Gly      |               |       |                    |      | 1.00          | 2.94  | 0.78  | 0.01 |
|                  | 9 Arg      |               |       |                    |      | 2.44          | 1.72  | 0.72  | 0.01 |
|                  | 10 Arg     |               |       |                    |      | 18.10         | 10.10 | 0.66  | 0.02 |
|                  | 11 Ile     |               |       |                    |      | 11.72         | 7.01  | 0.71  | 0.01 |
|                  | 12 Cys     |               |       |                    |      | 24.41         | 13.39 | 0.96  | 0.15 |
|                  | 13 Arg     |               |       |                    |      | 11.55         | 7.45  | 0.8   | 0.01 |
|                  | 14 Cys     |               |       |                    |      | 3.62          | 4.01  | 0.77  | 0.02 |
|                  | 15 Ile     |               |       |                    |      | 0.26          | 0.76  | 0.82  | 0.01 |
|                  | 16 Cys     |               |       |                    |      | 0.00          | 0.00  | 0.81  | 0.01 |
|                  | 17 Gly     |               |       |                    |      | 0.00          | 0.00  | 0.76  | 0.01 |
|                  | 18 Arg     |               |       |                    |      | 10.11         | 3.46  | 0.67  | 0.02 |



**Supplementary Table S6: Fitted parameters and errors using MODELFREE.**

| Model            | Residue(s) | $\tau_0$ (ps) | s.d.  | $D_{\text{ratio}}$ | s.d. | $\tau_i$ (ps) | s.d.   | $S^2$ | s.d. |
|------------------|------------|---------------|-------|--------------------|------|---------------|--------|-------|------|
| <i>IsoRigid</i>  |            |               |       |                    |      |               |        |       |      |
|                  | All        | 1.07          | 0.000 |                    |      |               |        |       |      |
| <i>Ax Rigid</i>  |            |               |       |                    |      |               |        |       |      |
|                  | All        | 1.06          | 0.002 | 0.90               | 0.01 |               |        |       |      |
| <i>Iso + Int</i> |            |               |       |                    |      |               |        |       |      |
|                  | All        | 1.13          | 0.002 |                    |      |               |        |       |      |
|                  | 1 Gly      |               |       |                    |      | 18.91         | 1.65   | 0.68  | 0.02 |
|                  | 2 Ile      |               |       |                    |      | 18.52         | 1.01   | 0.73  | 0.01 |
|                  | 3 Cys      |               |       |                    |      | 166.56        | 185.00 | 0.73  | 0.29 |
|                  | 4 Arg      |               |       |                    |      | 26.17         | 1.84   | 0.77  | 0.01 |
|                  | 5 Cys      |               |       |                    |      | 13.09         | 1.16   | 0.72  | 0.01 |
|                  | 6 Ile      |               |       |                    |      | 1.70          | 2.01   | 0.80  | 0.01 |
|                  | 7 Cys      |               |       |                    |      | 1.04          | 1.19   | 0.79  | 0.00 |
|                  | 8 Gly      |               |       |                    |      | 1.11          | 1.25   | 0.74  | 0.01 |
|                  | 9 Arg      |               |       |                    |      | 7.21          | 0.52   | 0.69  | 0.01 |
|                  | 10 Arg     |               |       |                    |      | 27.95         | 2.18   | 0.64  | 0.01 |
|                  | 11 Ile     |               |       |                    |      | 34.06         | 1.63   | 0.68  | 0.01 |
|                  | 12 Cys     |               |       |                    |      | 127.38        | 178.02 | 0.68  | 0.32 |
|                  | 13 Arg     |               |       |                    |      | 21.97         | 1.78   | 0.74  | 0.01 |
|                  | 14 Cys     |               |       |                    |      | 12.68         | 2.24   | 0.77  | 0.01 |
|                  | 15 Ile     |               |       |                    |      | 1.44          | 1.89   | 0.81  | 0.01 |
|                  | 16 Cys     |               |       |                    |      | 12.99         | 2.03   | 0.80  | 0.01 |
|                  | 17 Gly     |               |       |                    |      | 13.35         | 1.00   | 0.72  | 0.01 |
|                  | 18 Arg     |               |       |                    |      | 17.71         | 1.78   | 0.70  | 0.02 |
| <i>Ax + Int</i>  |            |               |       |                    |      |               |        |       |      |

|        |        |        |      |      |
|--------|--------|--------|------|------|
| All    | 1.16   | 0.009  |      |      |
| All    |        |        | 1.24 | 0.07 |
| 1 Gly  | 21.10  | 1.91   | 0.68 | 0.02 |
| 2 Ile  | 17.91  | 0.94   | 0.73 | 0.01 |
| 3 Cys  | 124.61 | 176.66 | 0.66 | 0.31 |
| 4 Arg  | 24.88  | 1.82   | 0.77 | 0.01 |
| 5 Cys  | 12.60  | 1.09   | 0.73 | 0.01 |
| 6 Ile  | 1.61   | 2.09   | 0.80 | 0.01 |
| 7 Cys  | 1.00   | 1.20   | 0.79 | 0.00 |
| 8 Gly  | 0.83   | 1.10   | 0.74 | 0.01 |
| 9 Arg  | 6.39   | 0.57   | 0.69 | 0.01 |
| 10 Arg | 27.92  | 2.30   | 0.64 | 0.01 |
| 11 Ile | 36.97  | 1.95   | 0.67 | 0.01 |
| 12 Cys | 127.37 | 177.14 | 0.72 | 0.30 |
| 13 Arg | 19.99  | 1.78   | 0.74 | 0.30 |
| 14 Cys | 11.79  | 2.33   | 0.77 | 0.01 |
| 15 Ile | 1.60   | 2.05   | 0.81 | 0.01 |
| 16 Cys | 11.22  | 1.96   | 0.80 | 0.01 |
| 17 Gly | 11.66  | 1.04   | 0.73 | 0.01 |
| 18 Arg | 26.09  | 3.00   | 0.68 | 0.02 |

---
